# Supplementary material for: Comprehensive target geometric errors and margin assessment in stereotactic partial breast irradiation
Source: Radiat Oncol. 2017 Sep 11;12:151. doi: 10.1186/s13014-017-0889-6 (PMC5594509; doi:10.1186/s13014-017-0889-6)
Supplement: Additional file 1: Appendix A. — 2D fiducial coordinates to 3D fiducial position conversion. Appendix B. Margin calculations. Appendix C. Multivariate linear regression model. (DOCX 29 kb) [file 13014_2017_889_MOESM1_ESM.docx]

**Appendix A. 2D fiducial coordinates to 3D fiducial position conversion**

The 2D fiducial coordinates and on the paired x-ray images and (Fig.1a) can be identified using an intensity threshold method. The identified coordinates were converted to 3D coordinates (*x*, *y*, *z*) while planning the CT DICOM coordinate system, expressed by the following equation:

| ; | (1) |
| --- | --- |

where , and , define the source-object distance and source-imager distance. Here, source refers to the kV imager source, object is the center defined by the two orthogonal imagers. Imagers are detector planes and in the Cyberknifesystem. , and , values are machine-specific and fixed at the Cyberknife installation.

**Appendix B. Margin calculations**

The margins related to rigid error (called *rigid margin*) were calculated using van Herk’s well-accepted recipe for various disease sites [[1-3](#_ENREF_1)]: , where Mr denotes the rigid margin in one translational direction [Anterior-Posterior (AP); Left-Right (LR); Superior-Inferior (SI)]. Σ and σ indicate systematic and random errors, respectively [[1](#_ENREF_1)]. The mean and standard deviation (SD) of the rigid errors (fraction level) are first obtained for each patient. The systematic error Σ is calculated as the SD of the means for each patient, and the random error σ is the root mean square of the SDs of all patients. Non-rigid errors are mainly affected by breast deformation. We propose to estimate the margin related to non-rigid errors (called *non-rigid margin*) in one translational direction as, where A indicates the number of patients; is the *i*th patient’s mean non-rigid error. In this formula, we assume that non-rigid errors are randomly directed in 3D space and the group mean is zero. Also, with a zero mean, is essentially a SD and provides a 95% confidence interval (CI) if we assume that non-rigid errors follow a normal distribution. Finally, the factor converts 3D amplitude to one direction (AP, LR, and SI) by assuming each direction equally contributed. Overall, the *total margin* in one translational direction can be written as .

**Appendix C. Multivariate linear regression model**

Given the hierarchical structure of our patient data, multivariate linear regression was described as a multi-level modelling problem, where patient-specific random effect and treatment fraction-specific random effect on the prediction results were allowed. Multivariate linear regression was formulated as:

|  | (2) |
| --- | --- |

where was the target geometric error from the measurement in the treatment fraction of patient , was the regression intercept, to were the regression coefficients of the seven clinical predictors to (i.e. the CTB, BV, Dlung, Dskin, PBR, LR and PA respectively). and were the random components of the patient-specific effect and treatment fraction-specific effect, which follow normal distributions and . was the regression error with distribution . The model was fitted using the Bayesian method [[4](#_ENREF_4), [5](#_ENREF_5)].

**References**

1. van Herk M: **Errors and margins in radiotherapy.** *Seminars in Radiation Oncology* 2004, **14:**52-64.

2. Ecclestone G, Bissonnette JP, Heath E: **Experimental validation of the van Herk margin formula for lung radiation therapy.** *Med Phys* 2013, **40:**111721.

3. Gupta T, Chopra S, Kadam A, Agarwal JP, Devi PR, Ghosh-Laskar S, Dinshaw KA: **Assessment of three-dimensional set-up errors in conventional head and neck radiotherapy using electronic portal imaging device.** *Radiat Oncol* 2007, **2:**44.

4. Brown PJ, Vannucci M, Fearn T: **Multivariate Bayesian Variable Selection and Prediction.** *Journal of the Royal Statistical Society Series B (Statistical Methodology)* 1998, **60:**627-641.

5. O'Hara RB, Sillanpaa MJ: **A review of Bayesian variable selection methods: what, how and which.** 2009**:**85-117.
